# Supplementary material for: A fast phosphate colorimetric sensor based on MoS2/UiO-66 (Fe/Zr) nanocomposites as oxidase-/peroxidase-like nanoenzymes
Source: Royal Society of Chemistry journal article supplement (doi:10.1039/d1nj03149j), 2021-01-01
Supplement: d1nj03149j1.pdf [file d1nj03149j1.pdf]

## Supporting information

### **A fast phosphate colorimetric sensor based on MoS<sub>2</sub>/UiO-66 (Fe/Zr) nanocomposites as oxidase-/peroxidase-like nanoenzymes**

**Baocan Zhu, Fengyang Zhao, Pingping Hao, Hongguan Yu, Renxia Jiang\*,  
Qingyun Liu\* and Zhenxue Liu\***

*College of Chemical and Biological Engineering, Shandong University of Science and  
Technology, Qingdao 266590, China*

**\* Corresponding Author**

E-mail: skd994684@sdust.edu.cn; qyliu@sdust.edu.cn; liuzhx1982@163.com

Tel: +86 0532 86057757

## **Instruments**

The morphology, phase and chemical states of MoS<sub>2</sub>/UiO-66(Fe/Zr) were characterized by the transmission electron microscope (TEM) (JEM-2100, JEOL, Japan), X-ray diffractometer (Cu-K $\alpha$  radiation,  $2\theta = 5^\circ$ - $80^\circ$ ,  $5^\circ/\text{min}$ ) and X-ray photoelectron spectroscopy (XPS, Thermo ESCALAB 250Xi, USA). The Brunauer-Emmett-Teller surface areas of MoS<sub>2</sub>/UiO-66(Fe/Zr) were analyzed on a Micromeritics ASAP 2460 and the bath temperature was 77.3 K. Fluorescent spectra and UV-vis absorption spectra were recorded on a fluorescence spectrophotometer (FL, Hitachi F-4600, Japan) and a UV-8000PC spectrophotometer (Puxi, TU 1810, China), respectively.

## **Synthesis of MoS<sub>2</sub>/UiO-66(Fe/Zr) nanocomposites**

50 mg of (NH<sub>4</sub>)<sub>2</sub>MoS<sub>4</sub> was dissolved into 30 mL of DMF. The above solution was treated by ultrasonic to make its liquid phase uniform. Subsequently, this solution was moved into Teflon liner, then kept at 200 °C for 10 h. After the solution was cooled to room temperature naturally, the primary product was centrifuged and washed with DMF and ethanol several times. The final obtained MoS<sub>2</sub> was dried in an oven at 60 °C for 10 h.

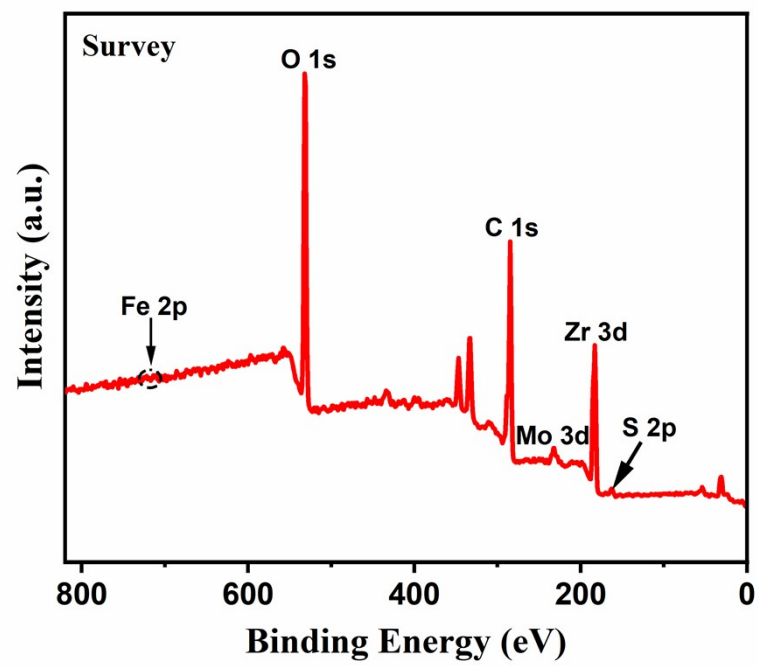

Fig. S1 The survey XPS spectrum of MoS<sub>2</sub>/UiO-66.

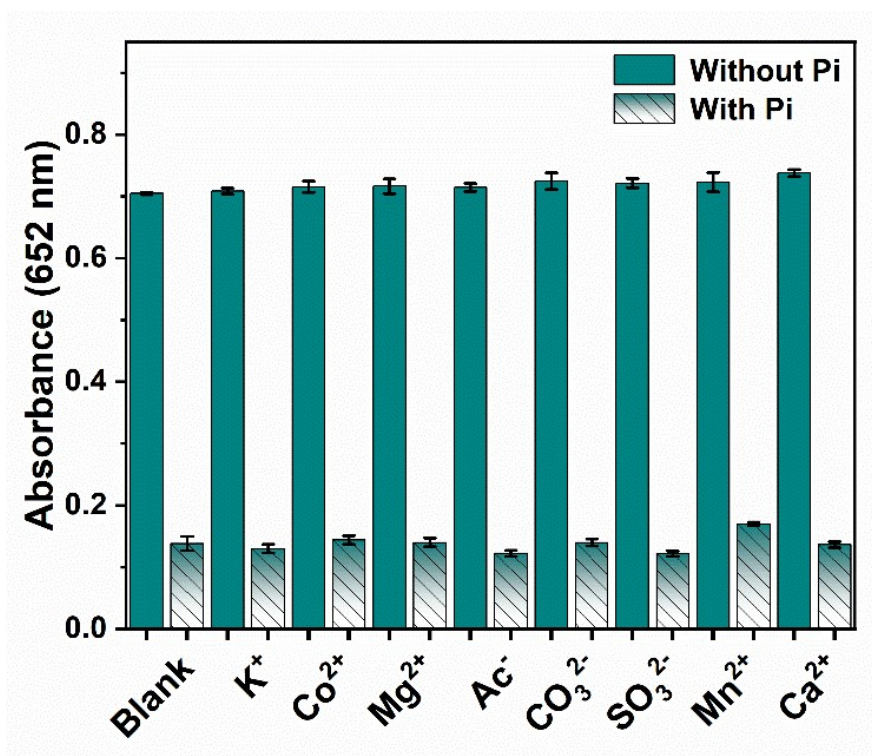

**Fig. S2** The responses of the MoS<sub>2</sub>/UiO-66(Fe/Zr)+TMB+H<sub>2</sub>O<sub>2</sub> system toward various interferents (Pi concentration: 100 μM; the concentrations of all the interfering ions are 1 mM).

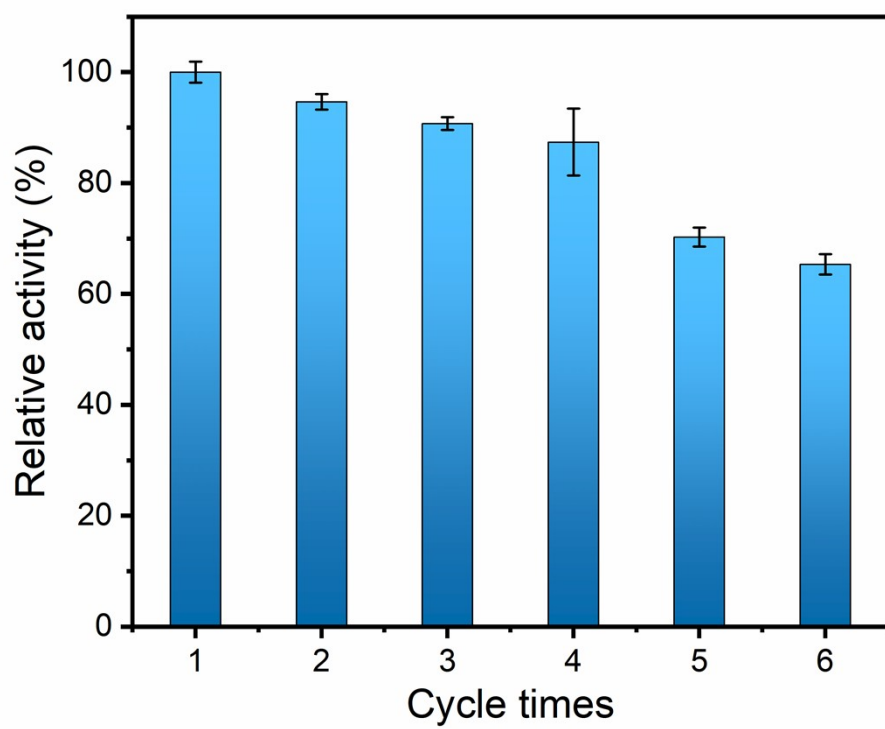

**Fig. S3** The Reusability of MoS<sub>2</sub>/UiO-66(Fe/Zr).

**Table S1** Kinetic parameters of MoS<sub>2</sub>/UiO-66, HRP and other nanoperoxidases.

| Catalyst                        | K <sub>m</sub> (mM)           |              | V <sub>max</sub> (10 <sup>-8</sup> Ms <sup>-1</sup> ) |              | Ref.             |
|---------------------------------|-------------------------------|--------------|-------------------------------------------------------|--------------|------------------|
|                                 | H <sub>2</sub> O <sub>2</sub> | TMB          | H <sub>2</sub> O <sub>2</sub>                         | TMB          |                  |
| HRP                             | 3.7                           | 0.434        | 8.71                                                  | 10           | 1                |
| MoS <sub>2</sub>                | 1.809                         | 2.668        | 1.642                                                 | 1.501        | 2                |
| Fe-loaded MOF-545(Fe)           | 1.69                          | 2.34         | 12                                                    | 85.4         | 3                |
| CeO <sub>2</sub> /C nanowire    | 2.61                          | 0.12         | 3.31                                                  | 2.08         | 4                |
| Ni-MOF nanosheet                | 2.49                          | 0.365        | 130                                                   | 6.53         | 5                |
| MoS <sub>2</sub> /UiO-66(Fe/Zr) | <b>1.231</b>                  | <b>0.255</b> | <b>3.185</b>                                          | <b>7.732</b> | <b>This work</b> |

**Table S2** Comparison of Pi detection limit of different sensing platforms.

| Materials                       | Linear range ( $\mu\text{M}$ ) | LOD ( $\mu\text{M}$ ) | Method              | Ref.      |
|---------------------------------|--------------------------------|-----------------------|---------------------|-----------|
| Pt/Au Nanowire                  | 248-1456                       | 45                    | Electrochemical     | 6         |
| Eu-BTB                          | 1-100                          | 10                    | Optical method      | 7         |
| DQS/Sn <sup>4+</sup> complex    | 30.2-45.7                      | 47.1                  | Fluorescent         | 8         |
| Tb(H <sub>2</sub> O)BTB MOF     | 40-400                         | 35                    | Fluorescent         | 9         |
| Molybdenum blue                 | 0-1000                         | 13                    | Colorimetric        | 10        |
| MoS <sub>2</sub> /UiO-66(Fe/Zr) | <b>10-100</b>                  | <b>6.4</b>            | <b>Colorimetric</b> | This work |

**Table S3** Analytical results of Pi in real water samples.

| Samples | Added ( $\mu\text{M}$ ) | Determined<br>by the colorimetric<br>( $\mu\text{M} \pm \text{SD}$ ) | Recovery (%)<br>(n = 3) | RSD (%) |
|---------|-------------------------|----------------------------------------------------------------------|-------------------------|---------|
| 1       | 60                      | $61.34 \pm 0.01$                                                     | 102.23                  | 0.51    |
| 2       | 70                      | $73.43 \pm 0.01$                                                     | 104.90                  | 1.11    |



**Table S4.** The comparison of response time of different nanozymes in detecting phosphate.

| nanozymes                                        | response time (min) | Ref.             |
|--------------------------------------------------|---------------------|------------------|
| Oxidized UiO-66(Ce/Zr)                           | 5                   | 11               |
| Fe <sub>3</sub> O <sub>4</sub> -DHCA             | 5                   | 12               |
| Fe/NC-SAs                                        | 10                  | 13               |
| Ce <sub>x</sub> Zr <sub>1-x</sub> O <sub>2</sub> | 5                   | 14               |
| MoS <sub>2</sub> /UiO-66(Fe/Zr)                  | 3                   | <b>This work</b> |

**Table S5.** The comparison of reaction time of different nanozymes with TMB.

| Nanozymes                            | reaction time (min) | conditions       | Ref.             |
|--------------------------------------|---------------------|------------------|------------------|
| Ni-MOF                               | 30                  | pH=3.5<br>T=50°C | 5                |
| 2D Fe-BTC                            | 15                  | pH=3.5<br>T=45°C | 15               |
| CeO <sub>2</sub> /C                  | 20                  | pH=4<br>T=45°C   | 16               |
| NiS/MMT/GO                           | 3                   | pH=4<br>T=55°C   | 17               |
| H <sub>2</sub> TCPP–CeO <sub>2</sub> | 15                  | pH=3.8<br>T=50°C | 18               |
| MoS <sub>2</sub> /UiO-66(Fe/Zr)      | 3                   | pH=4<br>T=50°C   | <b>This work</b> |

## References

1. L. Gao, J. Zhuang, L. Nie, J. Zhang, Y. Zhang, N. Gu, T. Wang, J. Feng, D. Yang, S. Perrett and X. Yan, *Nat. Nanotechnol.*, 2007, **2**, 577-583.
2. W. F. Dong, G. Chen, X. Hu, X. D. Zhang, W. B. Shi and Z. F. Fu, *Sens. Actuator B-Chem.*, 2020, **305**, 10.
3. C. Zhang, H. C. Li, C. Li and Z. Q. Li, *Molecules*, 2020, **25**, 13.
4. W. F. Dong and Y. M. Huang, *Microchim. Acta*, 2020, **187**, 10.
5. J. Y. Chen, Y. Shu, H. L. Li, Q. Xu and X. Y. Hu, *Talanta*, 2018, **189**, 254-261.
6. J. W. Cui, E. E. Ogabiela, J. N. Hui, Y. Wang, Y. Zhang, L. Tong, J. F. Zhang, S. B. Adeloju, X. Y. Zhang and Y. C. Wu, *J. Electrochem. Soc.*, 2015, **162**, B62-B67.
7. H. Xu, C. S. Cao and B. Zhao, *ChemComm*, 2015, **51**, 10280-10283.
8. J. Liu, K. Wu, X. Li, Y. Han and M. Xia, *RSC Adv.*, 2013, **3**, 8924-8928.
9. K. S. Asha, R. Bhattacharjee and S. Mandal, *Angew. Chem.-Int. Edit.*, 2016, **55**, 11528-11532.
10. H. S. Ruppertsberg, M. R. Goebel, S. I. Kleinert, D. Wuensch, K. Trautwein and R. Rabus, *J. Mol. Microbiol. Biotechnol.*, 2017, **27**, 73-80.
11. X. Li, X. Niu, P. Liu, X. Xu, D. Du and Y. Lin, *Sens. Actuator B-Chem.*, 2020, **321**.
12. X. Li, B. X. Liu, K. Ye, L. Ni, X. C. Xu, F. X. Qiu, J. M. Pan and X. H. Niu, *Sens. Actuator B-Chem.*, 2019, **297**, 7.
13. X. L. Xie, Y. F. Wang, X. B. Zhou, J. Y. Chen, M. K. Wang and X. G. Su, *Analyst*, 2021, **146**, 896-903.
14. X. Li, B. X. Liu, Z. Hu, P. Liu, K. Ye, J. M. Pan and X. H. Niu, *Environmental Research*, 2020, **189**.
15. A. I. Yuan, Y. W. Lu, X. D. Zhang, Q. M. Chen and Y. M. Huang, *Journal of Materials Chemistry B*, 2020, **8**, 9295-9303.
16. W. F. Dong and Y. M. Huang, *Microchim. Acta*, 2020, **187**.
17. M. M. Chen, J. L. Zhu, B. C. Yang, X. X. Yao, X. X. Zhu, Q. Y. Liu and X. T. Lyu, *Advanced Composites and Hybrid Materials*, 2018, **1**, 612-623.
18. Q. Y. Liu, Y. Y. Ding, Y. T. Yang, L. Y. Zhang, L. F. Sun, P. P. Chen and C. Gao, *Mater. Sci. Eng. C-Mater. Biol. Appl.*, 2016, **59**, 445-453.
